# Supplementary material for: A germanium and zinc chalcogenide as an anode for a high-capacity and long cycle life lithium battery
Source: Royal Society of Chemistry journal article supplement (doi:10.1039/c9ra06023e), 2019-01-01
Supplement: c9ra06023e1.pdf [file c9ra06023e1.pdf]

## Supplementary Information

### **Germanium and Zinc Chalcogenides as Anode for High-Capacity and Long-Cycle Lithium Batteries**

Xu Chen,<sup>†a</sup> Jian Zhou,<sup>†a</sup> Jiarui Li,<sup>a</sup> Haiyan Luo,<sup>a</sup> Lin Mei,<sup>a</sup> Tao Wang,<sup>\*a</sup> Jian Zhu<sup>\*a</sup> and Yong  
Zhang<sup>\*b</sup>

*a. State Key Laboratory for Chemo/Biosensing and Chemometrics, and College of Chemistry  
Institution, Hunan University, Changsha 410082, China. E-mail: jzhu@hnu.edu.cn*

*b. Fujian Provincial Key Laboratory of Functional Materials and Applications, Xiamen University of  
Technology, Xiamen 361024, China.*

*† These authors contributed equally to this work.*

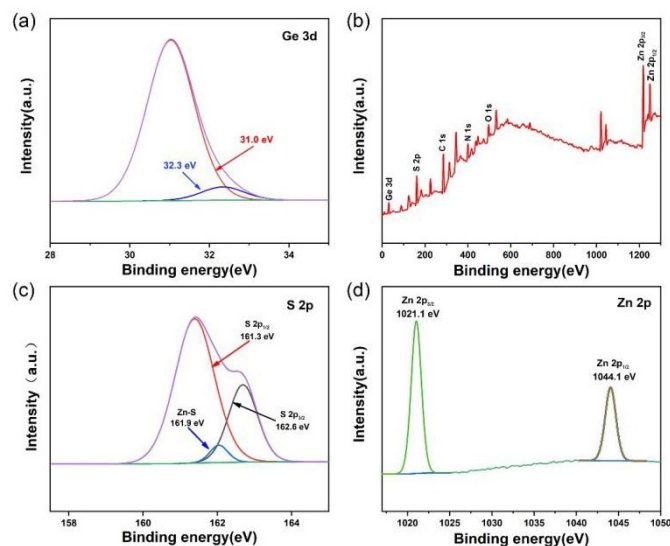

**Fig. S1** XPS spectra of (b) survey, (a) Ge 3d, (c) S 2p and (d) Zn 2p of the GZRZC.

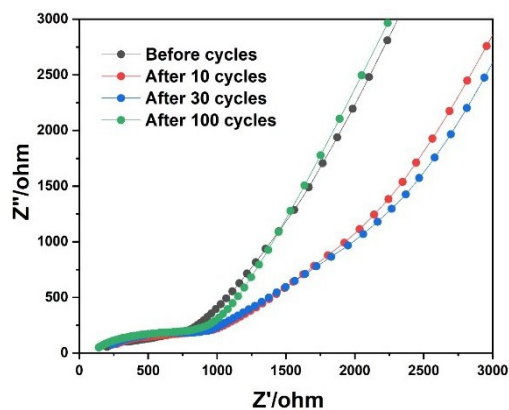

**Fig. S2** Nyquist plots of GZC electrode for the first 30 cycles in LIBs.

**Table S1.** The atomic ratios of C, N, O, S, Zn and Ge elements in the GZRZC.

| Element | Atomic (%) |
|---------|------------|
| C 1s    | 47.26      |
| S 2p    | 19.92      |
| N 1s    | 13.12      |
| O 1s    | 9.55       |
| Ge 3d   | 6.50       |
| Zn 2p   | 3.64       |
